# Supplementary material for: The formation of active phases in Pt-containing catalysts for bicyclohexyl dehydrogenation in hydrogen storage
Source: Royal Society of Chemistry journal article supplement (doi:10.1039/d2cp04457a), 2022-11-30
Supplement: d2cp04457a1.pdf [file d2cp04457a1.pdf]

Supporting Materials for

**The formation of active phases in Pt-containing catalysts for bicyclohexyl dehydrogenation  
in hydrogen storage**

Tatiana V. Bogdan<sup>a,b</sup>, Alexander N. Kalenchuk<sup>a,b</sup>, Leonid M. Kustov<sup>\*a,b</sup>, Viktor I. Bogdan<sup>a</sup>

<sup>a</sup> N. D. Zelinsky Institute of Organic Chemistry, Russian Academy of Sciences, 47 Leninsky  
prosp., Moscow, 119991, Russia

<sup>b</sup> Chemistry Department, Moscow State University, 1-3 Leninskie Gory, Moscow, 199991,  
Russia

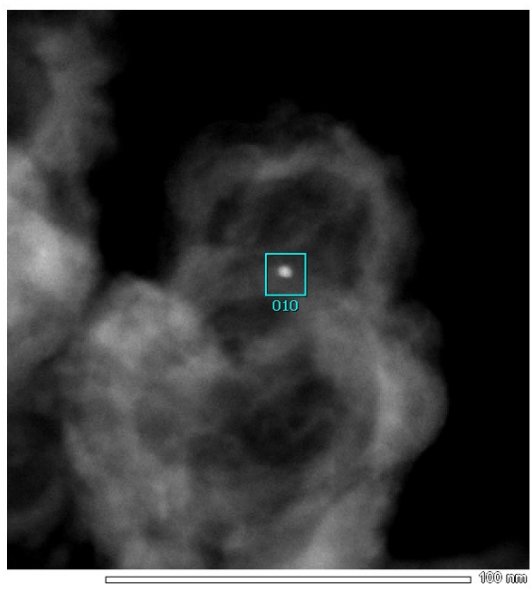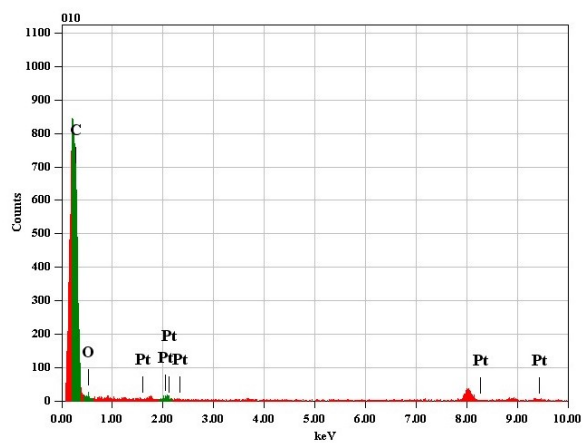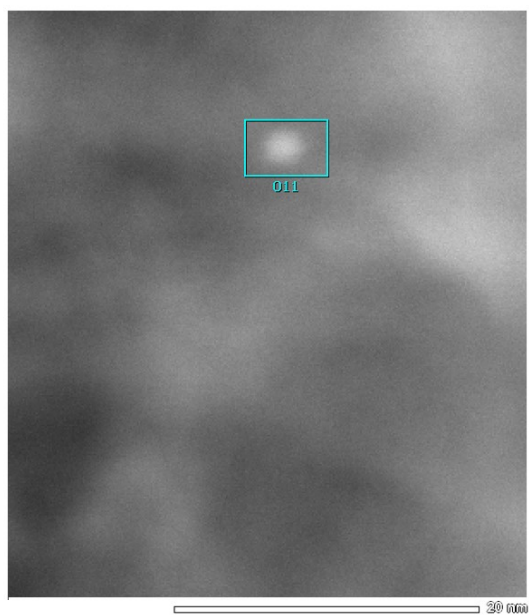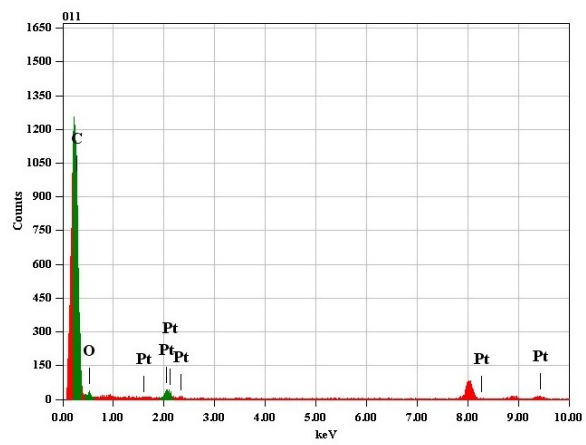

Fig. S1. EDX spectrum of the Pt/C catalyst before reduction.

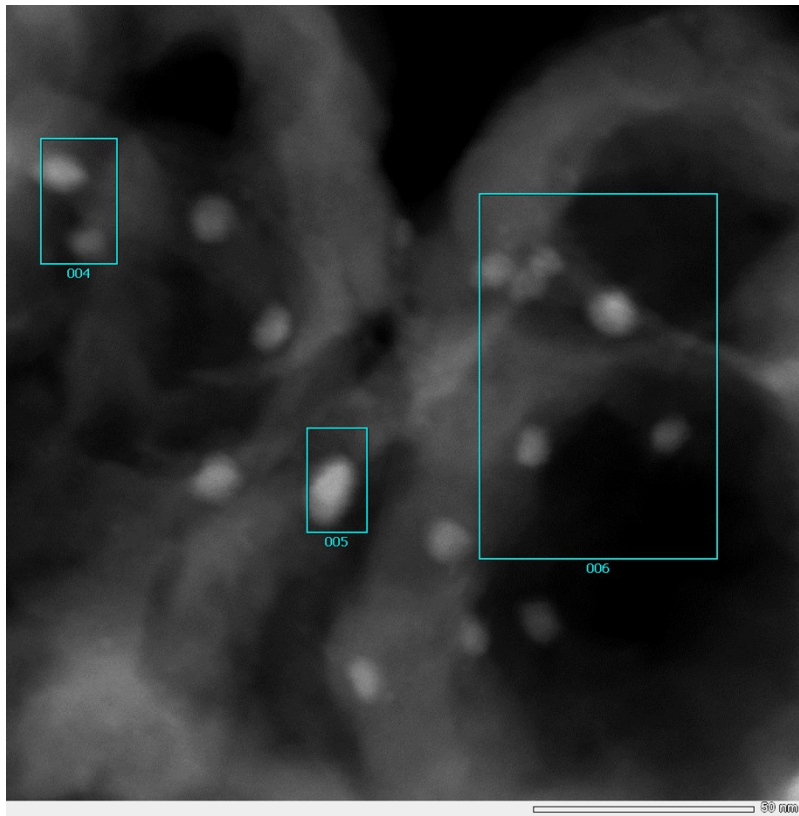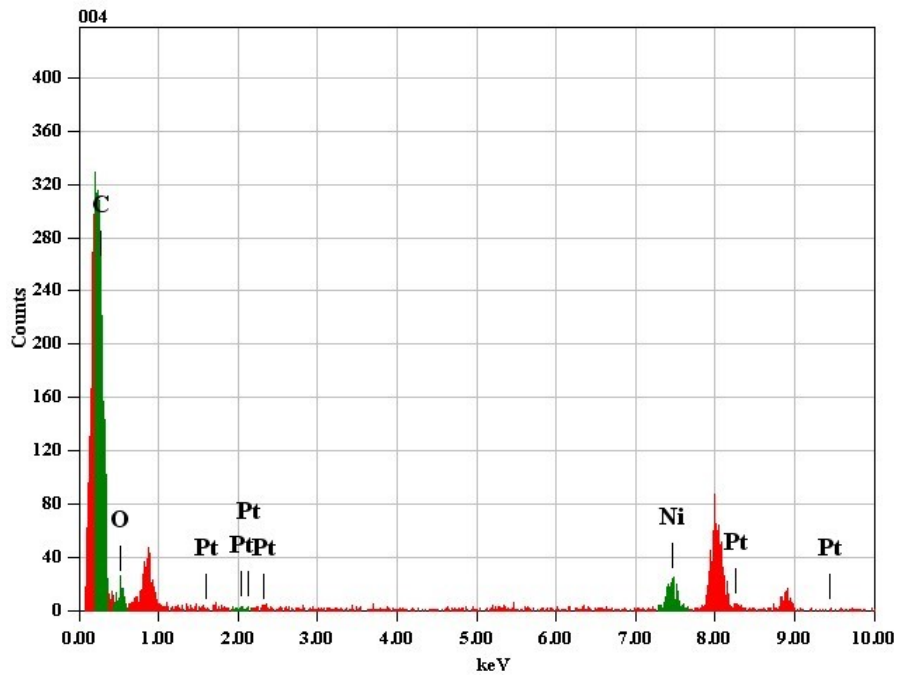

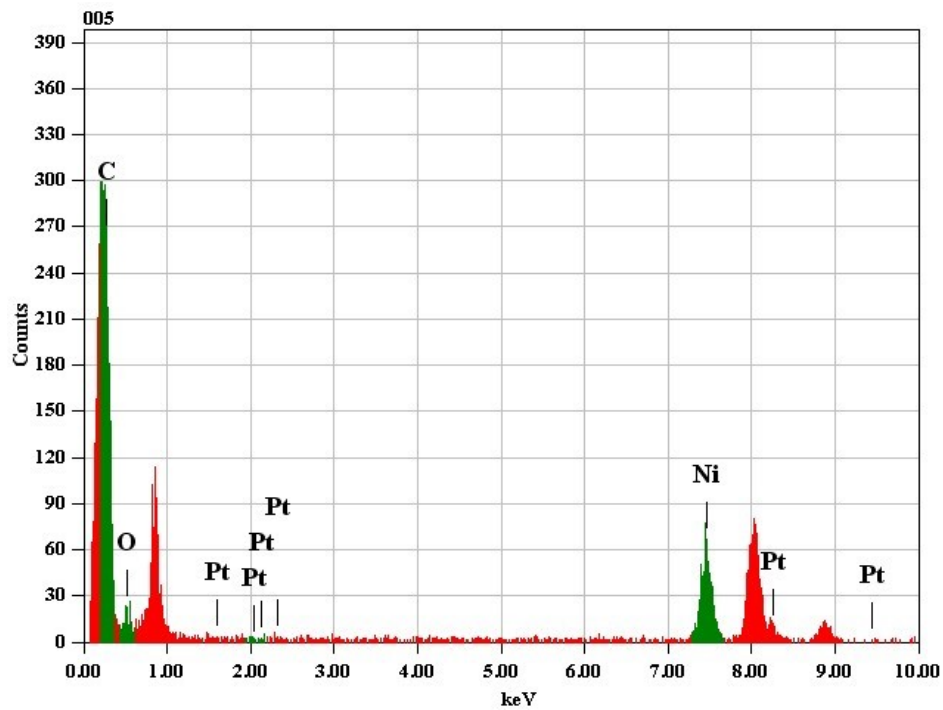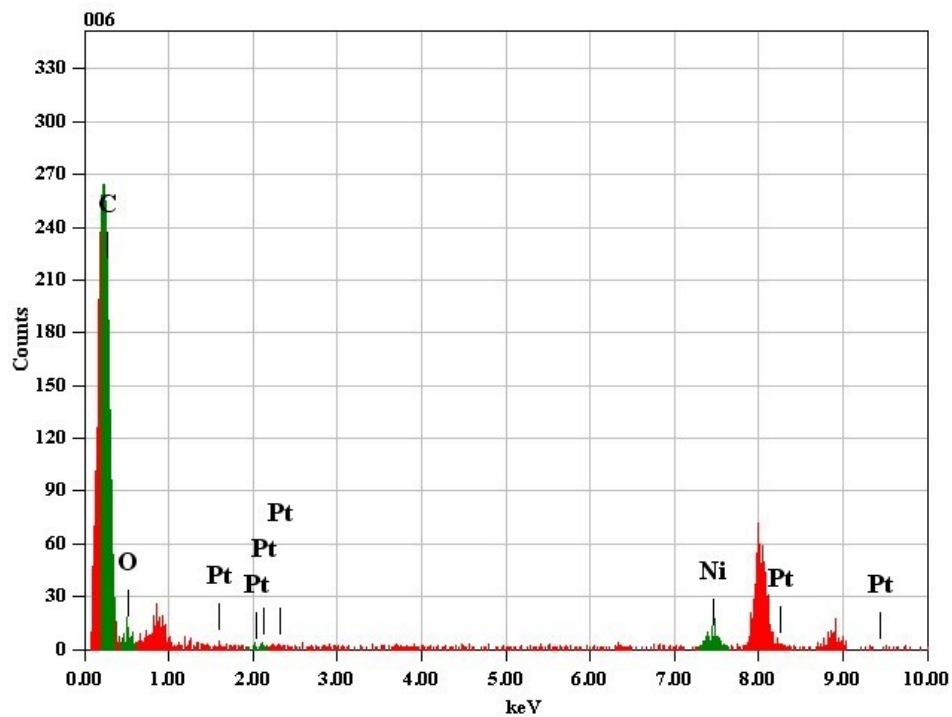

Fig. S2. EDX spectrum of the Pt/Ni/C catalyst before reduction.

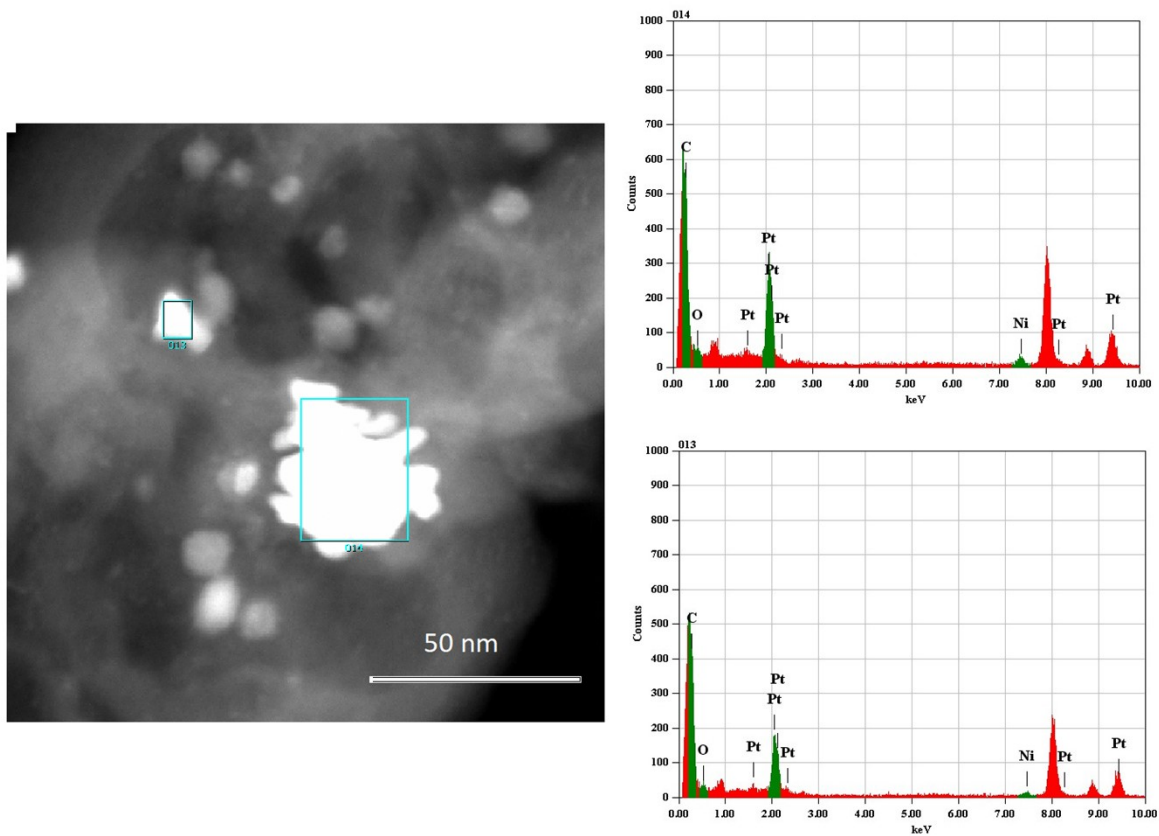

**Fig. S3.** TEM image and EDX spectrum of the Pt/Ni/C catalyst. Process spreading and enlargement of metal particles are connected with platinum atoms.

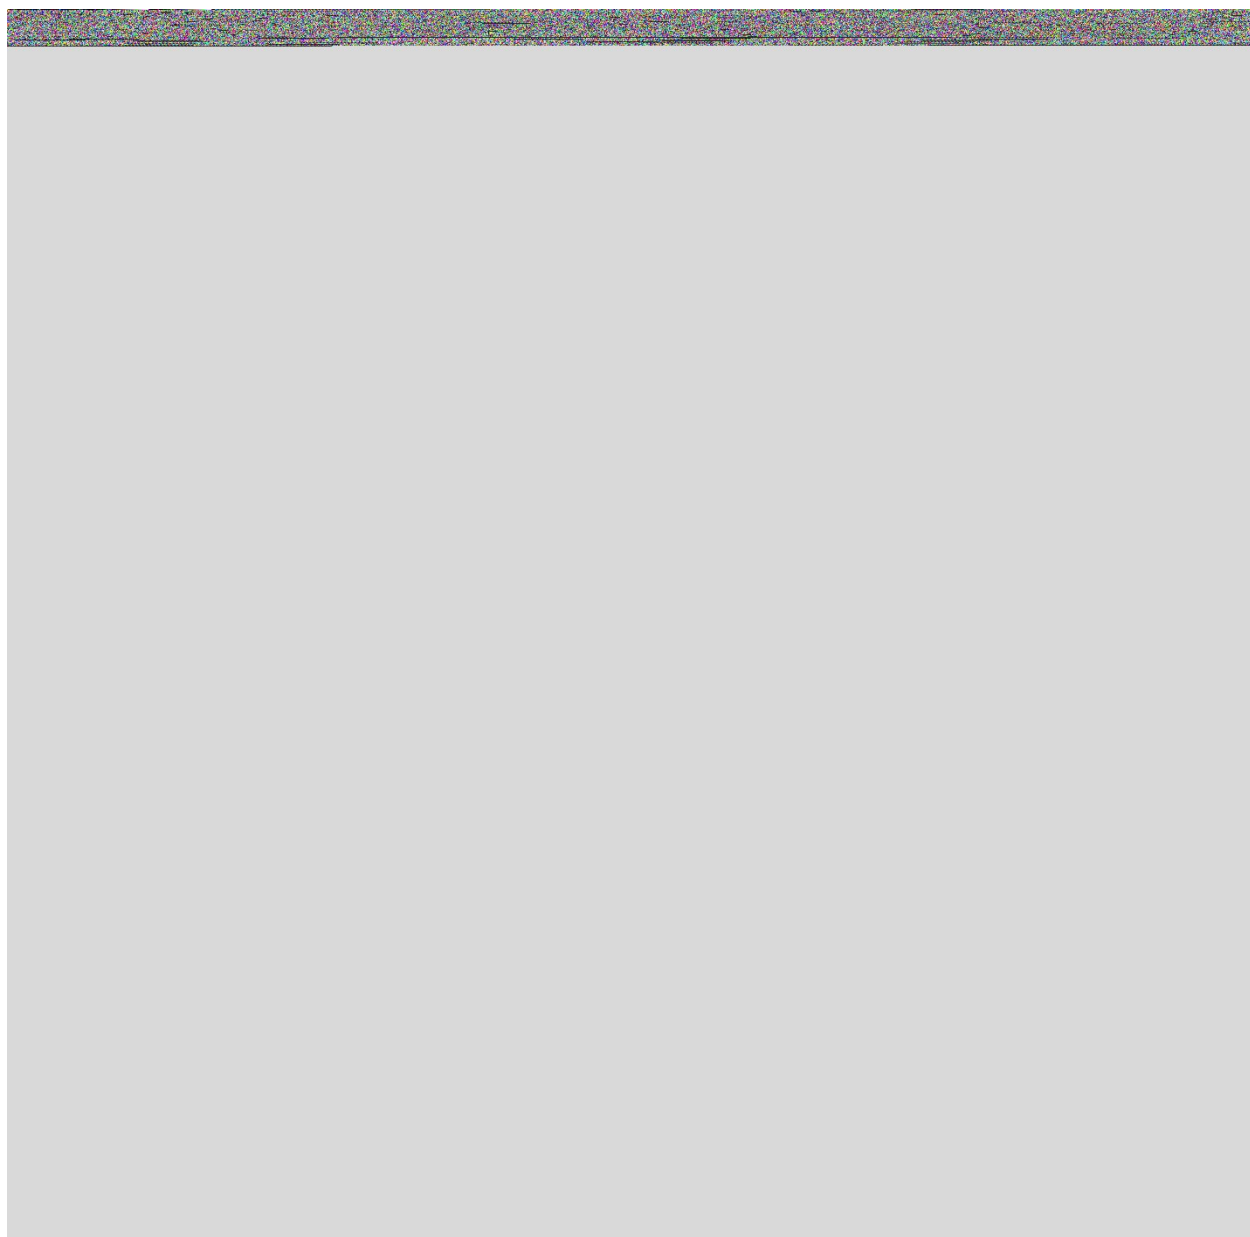

**Fig. S4.** TEM image and EDX spectrum of the Pt/Ni-Cr/C catalyst before reduction..

Table S1. Experimentally determined interplane distances  $d_{\text{ex}}$  (nm) from FFT image of the Pt/C catalyst in comparison with values of  $d_{\text{ref}}$  (hkl) [1,2] for platinum compounds and graphite.

| $d_{\text{exp}}$ , nm | $d_{\text{ref}}$ , nm (hkl) |                            |                |                |                |
|-----------------------|-----------------------------|----------------------------|----------------|----------------|----------------|
|                       | PtO<br>Fm-3m                | Pt <sub>2</sub> O<br>Pn-3m | Pt<br>Fm-3m    | PtC<br>Fm-3m   | Graphite       |
| 0.36-0.42             | 0.397<br>(011)              | 0.395<br>(100)             | 0.392<br>(100) | 0.386<br>(100) | 0.336<br>(002) |
| 0.20-0.22             |                             | 0.226<br>(111)             | 0.226<br>(111) | 0.224<br>(111) | 0.213<br>(100) |
| 0.18-0.19             |                             |                            | 0.196<br>(200) | 0.194<br>(200) | 0.180<br>(102) |

[1] ICDD (2018). *The Powder Diffraction File*. International Centre for Diffraction Data, Newtown Square, Pennsylvania, USA

[2] R. Lamber, N. Jaeger and G. Schulz-Ekloff, *Surface Sci.*, 1990, **227**, 15.
